# Supplementary material for: Comparing Sediment Microbiomes in Contaminated and Pristine Wetlands along the Coast of Yucatan
Source: MDPI journal article supplement (doi:10.3390/microorganisms9040877), 2021-04-20
Supplement: s1 [file s1]

**Supplementary Table S1.** Statistical data of the paired end reads for each sample analyzed in this study from four different locations. SD: Standard deviation; %: Percentage; F: forward; R: reverse.

| Location (year)               | Number of Reads | Total bases | Mean read length (SD) | Number of Filtered Reads (%) |
|-------------------------------|-----------------|-------------|-----------------------|------------------------------|
| <i>Bocas de Dzilam</i> (2019) | 93,929 F        | 28,154,347  | 299.7 (11.5)          | 63,894 (68.02)               |
|                               | 93,929 R        | 28,090,873  | 299.1 (11.3)          |                              |
| <i>Bocas de Dzilam</i> (2019) | 82,638 F        | 24,767,807  | 299.7 (12.7)          | 62,267 (75.35)               |
|                               | 82,638 R        | 24,698,252  | 298.9 (12.8)          |                              |
| <i>Bocas de Dzilam</i> (2019) | 93,922 F        | 28,115,237  | 299.3 (15)            | 70,047 (74.58)               |
|                               | 93,922 R        | 28,030,213  | 298.4 (15)            |                              |
| <i>El Palmar</i> (2018)       | 56,963 F        | 17,136,763  | 300.8 (3.1)           | 23,974 (42.09)               |
|                               | 56,963 R        | 17,076,155  | 299.8 (7.3)           |                              |
| <i>El Palmar</i> (2018)       | 47,789 F        | 14,375,024  | 300.8 (2)             | 19,568 (40.95)               |
|                               | 47,789 R        | 14,329,472  | 299.8 (6.2)           |                              |
| <i>El Palmar</i> (2017)       | 39,937 F        | 12,014,595  | 300.8 (3.2)           | 28,409 (71.13)               |
|                               | 39,937 R        | 11,970,763  | 299.7 (7.4)           |                              |
| <i>Progreso</i> (2019)        | 102,655 F       | 30,814,442  | 300.2 (10)            | 78,072 (76.05)               |
|                               | 102,655 R       | 30,726,022  | 299.3 (10)            |                              |
| <i>Progreso</i> (2019)        | 72,939 F        | 21,868,651  | 299.8 (12.1)          | 43,510 (59.65)               |
|                               | 72,939 R        | 21,807,806  | 299.0 (12)            |                              |
| <i>Progreso</i> (2019)        | 89,402 F        | 26,728,096  | 299 (16.1)            | 64,953 (72.65)               |
|                               | 89,402 R        | 26,650,848  | 298.1 (16.1)          |                              |
| <i>Sisal</i> (2018)           | 45,020 F        | 13,548,414  | 300.9 (2.5)           | 21,347 (47.42)               |
|                               | 45,020 R        | 13,496,115  | 299.8 (7.2)           |                              |
| <i>Sisal</i> (2018)           | 44,925 F        | 13,512,248  | 300.8 (3.6)           | 16,896 (37.61)               |
|                               | 44,925 R        | 13,468,107  | 299.8 (7.1)           |                              |
| <i>Sisal</i> (2017)           | 38,421 F        | 11,553,496  | 300.7 (4.6)           | 27,020 (70.33)               |
|                               | 38,421 R        | 11,514,926  | 299.7 (8.2)           |                              |
