# Supplementary material for: Comparing Sediment Microbiomes in Contaminated and Pristine Wetlands along the Coast of Yucatan
Source: MDPI journal article supplement (doi:10.3390/microorganisms9040877), 2021-04-20
Supplement: s1 [file s1]

**Supplementary Table S3.** Estimation of alpha diversity of sampling locations of wetlands from Yucatán. %: Percentage; SE: Standard error.

| <b>Sample (year)</b>   | <b>Observed</b> | <b>Shannon index</b> | <b>Chao1 (SE)</b> |
|------------------------|-----------------|----------------------|-------------------|
| Bocas de Dzilam (2019) | 384             | 5.53                 | 384 (0.02)        |
| Bocas de Dzilam (2019) | 466             | 5.89                 | 466 (0.08)        |
| Bocas de Dzilam (2019) | 420             | 5.73                 | 420 (0)           |
| El Palmar (2018)       | 179             | 4.91                 | 179 (0)           |
| El Palmar (2018)       | 147             | 4.68                 | 147 (0)           |
| El Palmar (2017)       | 191             | 5.0                  | 191 (0)           |
| Progreso (2019)        | 282             | 5.22                 | 282 (0)           |
| Progreso (2019)        | 188             | 4.79                 | 188 (0.27)        |
| Progreso (2019)        | 271             | 5.09                 | 271 (0.01)        |
| Sisal (2018)           | 49              | 3.34                 | 49 (0)            |
| Sisal (2018)           | 117             | 4.47                 | 117 (0)           |
| Sisal (2017)           | 204             | 5.06                 | 204 (0)           |
